# Supplementary material for: Mortality, Enzymatic Antioxidant Activity and Gene Expression of Cabbage Aphid (Brevicoryne brassicae L.) in Response to Trichoderma longibrachiatum T6
Source: Frontiers journal article supplement (doi:10.3389/fphys.2022.901115), 2022-07-19
Supplement: Table_1.docx [file Table_1.docx]

**Supplemental material Table 1. Key information of Genes**

| **Gene ID** | **Symbol** | **Transcript** | **Length (nt)** | **Protein** | **Length (aa)** | **Protein name** | **Organism** |
| --- | --- | --- | --- | --- | --- | --- | --- |
| 112679496 | LOC112679496 | XM_025549321.1 | 1105 | XP_025405106.1 | 148 | cofilin/actin-depolymerizing factor homolog | *Sipha flava* |
| 112679719 | LOC112679719 | XM_025549608.1 | 876 | XP_025405393.1 | 232 | probable glutathione peroxidase 2 | *Sipha flava* |
| 100159682 | LOC100159682 | XM_001943606.4 | 2021 | XP_001943641.1 | 504 | catalase | *Acyrthosiphon pisum* |
| 107169986 | LOC107169986 | XM_015519965.1 | 722 | XP_015375451.1 | 204 | glutathione S-transferase | *Diuraphis noxia* |
| 111033629 | LOC111033629 | XM_022314442.1 | 2396 | XP_022170134.1 | 667 | peroxidase-like | *Myzus persicae* |
| 113551032 | LOC113551032 | XM_026953034.1 | 1136 | XP_026808835.1 | 152 | superoxide dismutase [Cu-Zn] | *Rhopalosiphum maidis* |
